# Supplementary material for: Synthesis, structure and electrochemical properties of 3,4,5-triaryl-1,2-diphosphaferrocenes
Source: Royal Society of Chemistry journal article supplement (doi:10.1039/d2qi00446a), 2022-01-01
Supplement: d2qi00446a1.pdf [file d2qi00446a1.pdf]

Supplementary Information for:

**Synthesis, structure and electrochemical properties of 3,4,5-triaryl-1,2-diphosphaferrocenes**

*Ilya A. Bezkishko,<sup>1</sup> Almaz A. Zagidullin,<sup>\*1</sup> Mikhail N. Khrizanforov,<sup>1</sup> Tatiana P. Gerasimova,<sup>1</sup>  
Kamil A. Ivshin,<sup>1</sup> Olga N. Kataeva,<sup>1</sup> Yulia S. Ganushevich,<sup>2</sup> Vasili A. Miluykov,<sup>1</sup> Peter  
Lönnecke,<sup>3</sup> Evamarie Hey-Hawkins<sup>3</sup>*

<sup>1</sup>Arbuzov Institute of Organic and Physical Chemistry, FRC Kazan Scientific Center of RAS,  
Arbuzov Str. 8, 420088, Kazan, Russia, [zagidullin@iopc.ru](mailto:zagidullin@iopc.ru)

<sup>2</sup>Nesmeyanov Institute of Organoelement Compounds of Russian Academy of Sciences, 28  
Vavilov St., 119334 Moscow, Russia

<sup>3</sup>Leipzig University, Institute of Inorganic Chemistry, Johannisallee 29, D-04103 Leipzig,  
Germany, e-mail: [hey@uni-leipzig.de](mailto:hey@uni-leipzig.de)

## Table of contents

|                                                                                                                                             |    |
|---------------------------------------------------------------------------------------------------------------------------------------------|----|
| Experimental part                                                                                                                           | 3  |
| Synthesis, NMR- and IR- data for 3,4,5-triaryl-1,2-diphosphaferrocene <b>2a-c</b>                                                           | 5  |
| Fig. S1. Experimental and calculated (bottom, convoluted with a Lorentzian lineshape function fwhm = 0.25 eV) UV-Vis spectra of <b>2a-c</b> | 7  |
| Table S1. Crystallographic data for the compounds <b>2a-c</b>                                                                               | 8  |
| Table S2. Bond lengths [Å], angles [°] and Torsion angles [°] for <b>2a-c</b>                                                               | 9  |
| References                                                                                                                                  | 13 |

## Experimental part

**General** All reactions and manipulations were carried out under dry pure N<sub>2</sub> in standard Schlenk apparatus. All solvents were distilled from sodium/benzophenone or phosphorus pentoxide and stored under nitrogen before use. The NMR spectra were recorded on a Bruker MSL-400 (<sup>1</sup>H 400 MHz, <sup>31</sup>P 161.7 MHz, <sup>13</sup>C 100.6 MHz). SiMe<sub>4</sub> was used as internal reference for <sup>1</sup>H and <sup>13</sup>C NMR chemical shifts, and 85% H<sub>3</sub>PO<sub>4</sub> as external reference for <sup>31</sup>P NMR. All experiments were carried out using standard Bruker pulse programs. Infrared (IR) spectra were recorded on a Bruker Vector-22 spectrometer. The elemental analyses were carried out at the microanalysis laboratory of the Arbuzov Institute of Organic and Physical Chemistry, Russian Academy of Sciences.

**UV-Vis Experiments** Electronic absorption (UV-Vis) spectra were recorded at room temperature on a Perkin-Elmer Lambda 35 spectrometer using 10 mm quartz cells. Absorption spectra were registered with a scan speed of 480 nm/min, using a spectral width of 1 nm. All samples were prepared as solutions in dichloromethane with the concentrations ~ 2 – 5 · 10<sup>-5</sup> mol L<sup>-1</sup>.

**DFT calculations** All calculations were performed with the Gaussian 16 suite of programs.<sup>1</sup> The hybrid PBE0 functional<sup>2</sup> and the Ahlrichs' triple- $\zeta$  def-TZVP AO basis set<sup>3</sup> were used for optimization of all structures. In all geometry optimizations, the D3 approach<sup>4</sup> was applied to describe the London dispersion interactions as implemented in the Gaussian 16 program. Time-dependent density functional response theory (TD-DFT) with the use of long-range-corrected CAM-B3LYP functional<sup>5</sup> has been employed to compute the vertical excitation energy (i.e., absorption wavelength) and oscillator strength for the ground state optimized geometries. For simulation of the solvent effects, conductor-like polarizable continuum model (C-PCM) was used as implemented in the Gaussian program.<sup>6</sup>

**Electrochemical measurements** were conducted with a BASi Epsilon ECclipse electrochemical analyzer (USA). The program concerned Epsilon-EC-USB-V200 waves. A conventional three-electrode system was used with glassy carbon (GC) or carbon paste electrode (CPE) solutions for powder samples as the working electrode, the Ag/AgCl (0.01 M) electrode as the reference electrode, and a Pt wire as the counter electrode. 0.1 M Et<sub>4</sub>NBF<sub>4</sub> was used as the supporting electrolyte to determine the current–voltage characteristics.

To study the powder samples, a modified CPE working electrode was used, which was prepared as follows: the carbon particles/phosphonium salt (dodecyl(tri-*tert*-butyl)phosphonium tetrafluoroborate) composite electrode was prepared by grinding a mixture of graphite powder and phosphonium salt with a 70/30 (w/w) ratio in a mortar giving a homogeneous mass.<sup>7</sup> A modified electrode was also devised in a similar manner except that a portion (ca. 5%) of the graphite powder was replaced by the investigated compound under study. As a result, a portion of the resulting paste was packed firmly into the Teflon holder cavity (3 mm in diameter).

**X-ray single-crystal diffraction.** The X-ray diffraction data for single crystals of **2a** and **2c** were collected on a Bruker AXS Kappa APEX Duo diffractometer, and for **2b** on a Rigaku Oxford Diffraction Gemini diffractometer. Data collection was performed employing an  $\omega/\varphi$ -scan mode. The programs used were APEX3 (CrysAlis Pro)<sup>8</sup> for data collection, SAINT<sup>9</sup> for data reduction, SADABS (**2b**: SCALE3 ABSPACK implemented in CrysAlis Pro)<sup>10</sup> for multi-scan absorption correction, SHELXT<sup>11</sup> for structure solution, and SHELXL<sup>12</sup> for structure refinement by full-matrix least-squares against  $F^2$ . All non-hydrogen atoms were refined

anisotropically. Except **2b**, hydrogen atoms at carbon atoms were placed at calculated positions and refined as riding atoms. Compound **2c** was a thin weakly diffracting needle, which resulted in low resolution, poor data/parameter ratio and low completeness; however, the structure was determined unambiguously. The crystal data and refinement parameters are presented in Table S1. CCDC 2153723 (**2a**), 2144693 (**2b**), 2153724 (**2c**), contain the supplementary crystallographic data for this paper.

## Synthesis, NMR- and IR- data for 3,4,5-triaryl-1,2-diphosphaferrocene 2a-c

**Starting materials:**  $[\text{FeCp}(\eta^6\text{-C}_6\text{H}_5\text{CH}_3)][\text{PF}_6]^{13}$  and  $\text{Na}(\text{diglyme})_2\text{-3,4,5-triaryl-1,2-diphosphacyclopentadienides (1a-c)}^{14,15}$  were prepared according to literature procedures.

**3,4,5-Triphenyl-1,2-diphosphaferrocene (2a):**  $[\text{FeCp}(\eta^6\text{-C}_6\text{H}_5\text{CH}_3)][\text{PF}_6]$  (2.23 g, 6.23 mmol) was added to sodium 3,4,5-triphenyl-1,2-diphospholide (**1a**) (3.86 g, 6.23 mmol) which was previously dissolved in 25 ml diglyme and cooled to  $-80\text{ }^\circ\text{C}$ . The reaction mixture was stirred at low temperature for a 3 h and then heated to  $160\text{ }^\circ\text{C}$  for an additional 3 h. Then the reaction mixture was cooled to room temperature, the solvent was evaporated and the remaining solid was dissolved in 30 ml toluene, passed through a layer of silica (4-5 cm), and the silica was additionally washed with toluene (3x 15 ml). After removal of the solvent **2a** was obtained as a reddish oil (2.05 g, 73% yield), which crystallized on standing.

$^1\text{H NMR}$  ( $\text{CDCl}_3$ ,  $\delta$ , ppm): 4.59 (s, 5H, Cp), 7.08-7.22 (m, 15H, Ph).

$^{31}\text{P}\{^1\text{H}\}$  NMR ( $\text{CDCl}_3$ ,  $\delta$ , ppm): -13.4 (s).

$^{13}\text{C}\{^1\text{H}\}$  ( $\text{CDCl}_3$ ,  $\delta$ , ppm,  $J$ , Hz): 75.6 (s, Cp), 108.1 (ps.t,  $^2J_{\text{CP}} = 5.4$ ,  $\text{P}_2\text{C}_3$ ), 114.5 (ps.t,  $^1J_{\text{CP}} = 41.7$ ,  $\text{P}_2\text{C}_3$ ), 126.3 (s,  $p\text{-C}$  in Ph), 126.8 (s,  $p\text{-C}$  in Ph), 127.3 (s,  $m\text{-C}$  in Ph), 130.9 (s,  $o\text{-C}$  in Ph), 132.3 (s,  $o\text{-C}$  in Ph), 137.2 (s,  $ipso\text{-C}$  in Ph), 141.0 (ps.t,  $^2J_{\text{CP}} = 8.0$  Hz,  $ipso\text{-C}$  in Ph).

IR (KBr,  $\text{cm}^{-1}$ ): 3078 (w), 3054 (w), 3022 (w), 2963 (w), 1596 (m), 1490 (s), 1442 (m), 1414 (w), 1261 (m), 1173 (w), 1156 (w), 1096 (m), 1076 (s), 1028 (s), 1007 (m), 910 (w), 825 (m), 790 (m), 755 (m), 729 (s), 695 (s), 653 (m), 581 (m), 559 (s), 478 (w), 451 (m), 424 (m).

Calculated for  $\text{C}_{26}\text{H}_{20}\text{FeP}_2$  (M 450.2): C 69.33, H 4.44, Fe 12.44, P 13.77. Found: C 70.04, H 4.87, P 13.32.

**3,4,5-Tris(*p*-methylphenyl)-1,2-diphosphaferrocene (2b):**  $[\text{FeCp}(\eta^6\text{-C}_6\text{H}_5\text{CH}_3)][\text{PF}_6]$  (1.16 g, 3.26 mmol) was added to sodium 3,4,5-tris(*p*-methylphenyl)-1,2-diphospholide (**1b**) (2.16 g, 3.26 mmol) which was previously dissolved in 25 ml diglyme and cooled to  $-80\text{ }^\circ\text{C}$ . The reaction mixture was stirred at low temperature for 3 h and then heated to  $160\text{ }^\circ\text{C}$  for an additional 3 h. Then the reaction mixture was cooled to room temperature, the solvent was evaporated and the remaining solid was dissolved in 30 ml toluene, passed through a layer of silica (4-5 cm), and the silica was additionally washed with toluene (3x 15 ml). After removal of the solvent **2b** was obtained as a reddish oil (1.25 g, 78% yield), which crystallized on standing.

$^1\text{H NMR}$  ( $\text{CDCl}_3$ ,  $\delta$ , ppm): 2.20 (s, 9H, Me), 4.44 (s, 5H, Cp), 6.83 (d, 6H, Ph), 6.91 (d, 6H, Ph).

$^{31}\text{P}\{^1\text{H}\}$  NMR ( $\text{CDCl}_3$ ,  $\delta$ , ppm): -15.4 (s).

$^{13}\text{C}\{^1\text{H}\}$  ( $\text{CDCl}_3$ ,  $\delta$ , ppm,  $J$ , Hz): 20.9 (s, Me), 75.4 (s, Cp), 107.6 (ps.t,  $^2J_{\text{PC}} = 5.3$ ,  $\text{P}_2\text{C}_3$ ), 114.3 (ps.t,  $^1J_{\text{PC}} = 40.9$ ,  $\text{P}_2\text{C}_3$ ), 128.0 (s,  $p\text{-C}$  in Ph), 130.7 (s,  $m\text{-C}$  in Ph), 132.1 (s,  $m\text{-C}$  in Ph), 134.1 (s,  $o\text{-C}$  in Ph), 135.8 (s,  $o\text{-C}$  in Ph), 136.2 (s,  $ipso\text{-C}$  in Ph), 138.2 (ps.t,  $^2J_{\text{PC}} = 7.9$  Hz,  $ipso\text{-C}$  in Ph).

IR (KBr,  $\text{cm}^{-1}$ ): 3082 (w), 3046 (w), 3023 (w), 2962 (w), 2918 (w), 2866 (w), 1899 (w), 1608 (w), 1511 (s), 1449 (m), 1415 (m), 1261 (s), 1181 (m), 1086 (br.), 1021 (s), 809 (s), 733 (m), 664 (w), 557 (m), 533 (w), 500 (m), 447 (m).

Calculated for  $\text{C}_{29}\text{H}_{26}\text{FeP}_2$  (M 492.3): C 70.73, H 5.29, Fe 11.38, P 12.60. Found: C 71.23, H 5.87, P 12.34.

**3,4,5-Tris(*p*-chlorophenyl)-1,2-diphosphaferrocene (2c):**  $[\text{FeCp}(\eta^6\text{-C}_6\text{H}_5\text{CH}_3)][\text{PF}_6]$  (1.62 g, 4.52 mmol) was added to sodium 3,4,5-tris(*p*-chlorophenyl)-1,2-diphospholide (**1c**) (3.27 g, 4.52 mmol) which was previously dissolved in 25 ml diglyme and cooled to -80 °C. The reaction mixture was stirred at low temperature for 3 h and then heated to 160 °C for an additional 3 h. Then the reaction mixture was cooled to room temperature, the solvent was evaporated and the remaining solid was dissolved in 30 ml toluene, passed through a layer of silica (4-5 cm), and the silica was additionally washed with toluene (3x 15 ml). After removal of the solvent **2c** was obtained as a reddish oil (1.77 g, 71% yield), which crystallized on standing.

$^1\text{H}$  NMR ( $\text{CDCl}_3$ ,  $\delta$ , ppm): 4.45 (s, 5H, Cp), 6.92 (d, 6H, Ph), 7.02 (d, 6H, Ph).

$^{31}\text{P}\{^1\text{H}\}$  NMR ( $\text{CDCl}_3$ ,  $\delta$ , ppm): -11.4 (s).

$^{13}\text{C}\{^1\text{H}\}$  ( $\text{CDCl}_3$ ,  $\delta$ , ppm,  $J$ , Hz): 75.7 (s, Cp), 106.8 (ps.t,  $^2J_{\text{PC}} = 5.5$ ,  $\text{P}_2\text{C}_3$ ), 113.2 (ps.t,  $^1J_{\text{PC}} = 41.7$ ,  $\text{P}_2\text{C}_3$ ), 127.7 (s, *p*-C in Ph), 128.0 (s, *p*-C in Ph), 131.9 (s, *m*-C in Ph), 132.6 (s, *m*-C in Ph), 133.2 (s, *o*-C in Ph), 133.4 (s, *o*-C in Ph), 135.3 (s, *ipso*-C in Ph), 139.2 (ps.t,  $^2J_{\text{PC}} = 8.1$  Hz, *ipso*-C in Ph).

IR (KBr,  $\text{cm}^{-1}$ ): 3049 (w), 2946 (w), 2918 (w), 2857 (w), 1897 (w), 1590 (w), 1486 (s), 1397 (m), 1262 (w), 1173 (w), 1088 (s), 1013 (s), 962 (w), 935 (w), 829 (s), 815 (s), 744 (s), 721 (w), 699 (w), 655 (w), 649 (w), 557 (m), 501 (w), 513 (w), 478 (w), 451 (w).

Calculated for  $\text{C}_{26}\text{H}_{17}\text{Cl}_3\text{FeP}_2$  (M 553.5): C 56.37, H 3.07, Cl 19.24, Fe 10.12, P 11.20. Found: C 56.43, H 3.18, P 11.14.

**Fig. S1** Experimental (top, in  $\text{CH}_2\text{Cl}_2$ ,  $c = 10^{-5}$ ) and calculated (bottom, convoluted with a Lorentzian lineshape function  $\text{fwhm} = 0.25$  eV) UV-Vis spectra of **2a** (black), **2b** (blue) and **2c** (red).

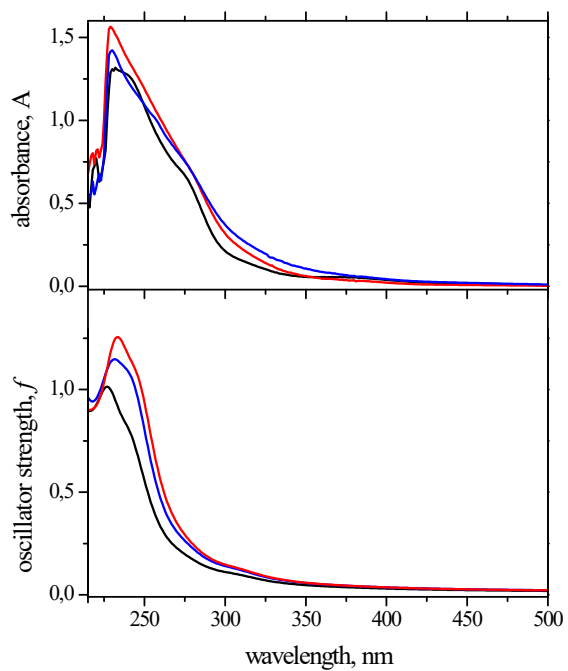

**Table S1** Crystallographic data for the compounds **2a-c**

| Compound                                           | <b>2a</b>                                                           | <b>2b</b>                                                           | <b>2c</b>                                                         |
|----------------------------------------------------|---------------------------------------------------------------------|---------------------------------------------------------------------|-------------------------------------------------------------------|
| Formula                                            | C <sub>26</sub> H <sub>20</sub> FeP <sub>2</sub>                    | C <sub>29</sub> H <sub>26</sub> FeP <sub>2</sub>                    | C <sub>26</sub> H <sub>17</sub> Cl <sub>3</sub> FeP <sub>2</sub>  |
| Formula weight (g mol <sup>-1</sup> )              | 450.21                                                              | 492.29                                                              | 553.53                                                            |
| Temperature (K)                                    | 150                                                                 | 130(2)                                                              | 150                                                               |
| Wavelength (Å)                                     | 0.71073                                                             | 0.71073                                                             | 1.54178                                                           |
| Crystal system                                     | Monoclinic                                                          | Monoclinic                                                          | Monoclinic                                                        |
| Space group                                        | Pn                                                                  | P2 <sub>1</sub> /n                                                  | Cc                                                                |
| Unit cell dimensions (Å, °)                        | <i>a</i> = 10.732(1)                                                | <i>a</i> = 7.8372(2)                                                | <i>a</i> = 16.291(1)                                              |
|                                                    | <i>b</i> = 8.8035(8)                                                | <i>b</i> = 19.1823(5)                                               | <i>b</i> = 18.523(1)                                              |
|                                                    | <i>c</i> = 10.996(1)                                                | <i>c</i> = 15.8804(4)                                               | <i>c</i> = 7.7350(5)                                              |
|                                                    | <i>β</i> = 97.154(2)                                                | <i>β</i> = 91.495(2)                                                | <i>β</i> = 96.554(4)                                              |
| Volume (Å <sup>3</sup> )                           | 1030.8(2)                                                           | 2386.6(1)                                                           | 2318.8(3)                                                         |
| Z                                                  | 2                                                                   | 4                                                                   | 4                                                                 |
| <i>d</i> <sub>calc</sub> (g cm <sup>-3</sup> )     | 1.450                                                               | 1.370                                                               | 1.586                                                             |
| <i>μ</i> (mm <sup>-1</sup> )                       | 0.897                                                               | 0.781                                                               | 9.803                                                             |
| F(000)                                             | 464                                                                 | 1024                                                                | 1120                                                              |
| Crystal size (mm <sup>3</sup> )                    | 0.234 x 0.125 x<br>0.112                                            | 0.20 x 0.20 x 0.02                                                  | 0.321 x 0.036 x<br>0.033                                          |
| <i>θ</i> range (°)                                 | 2.313 to 28.762                                                     | 2.123 to 30.692                                                     | 3.627 to 58.280                                                   |
| Index ranges                                       | -14 ≤ <i>h</i> ≤ 14,<br>-11 ≤ <i>k</i> ≤ 11,<br>-14 ≤ <i>l</i> ≤ 14 | -11 ≤ <i>h</i> ≤ 11,<br>-27 ≤ <i>k</i> ≤ 27,<br>-22 ≤ <i>l</i> ≤ 22 | -16 ≤ <i>h</i> ≤ 17,<br>-19 ≤ <i>k</i> ≤ 19,<br>-6 ≤ <i>l</i> ≤ 8 |
| Reflections collected                              | 20691                                                               | 45581                                                               | 12427                                                             |
| Independent reflections                            | 5328                                                                | 6894                                                                | 2493                                                              |
| Observed reflections                               | 4758                                                                | 4513                                                                | 2416                                                              |
| R <sub>int</sub>                                   | 0.0454                                                              | 0.0803                                                              | 0.0400                                                            |
| Completeness to <i>θ</i> <sub>full</sub> (%)       | 100.0                                                               | 100 % (28.29°)                                                      | 89.1                                                              |
| Data / restraints /<br>parameters                  | 5328 / 2 / 262                                                      | 6894 / 30 / 393                                                     | 2493 / 2 / 289                                                    |
| Goodness-of-fit on F <sup>2</sup>                  | 1.024                                                               | 1.006                                                               | 1.057                                                             |
| Final R indices [ <i>I</i> > 2σ( <i>I</i> )]       | R <sub>1</sub> = 0.0296,<br>wR <sup>2</sup> = 0.0558                | R <sub>1</sub> = 0.0495,<br>wR <sup>2</sup> = 0.0968                | R <sub>1</sub> = 0.0261,<br>wR <sup>2</sup> = 0.0669              |
| R indices (all data)                               | R <sub>1</sub> = 0.0376,<br>wR <sub>2</sub> = 0.0582                | R <sub>1</sub> = 0.0956,<br>wR <sub>2</sub> = 0.1134                | R <sub>1</sub> = 0.0271,<br>wR <sub>2</sub> = 0.0679              |
| Absolute structure<br>parameter                    | -0.003(7)                                                           | –                                                                   | -0.018(5)                                                         |
| Largest diff. peak and hole<br>(eÅ <sup>-3</sup> ) | 0.320 and -0.256                                                    | 0.393 and -0.338                                                    | 0.200 and -0.325                                                  |



**Table S2.** Bond lengths [Å] and angles [°] for **2a**

---

|                 |            |
|-----------------|------------|
| Fe(1)-C(6)      | 2.057(3)   |
| Fe(1)-C(5)      | 2.058(3)   |
| Fe(1)-C(8)      | 2.058(3)   |
| Fe(1)-C(4)      | 2.058(3)   |
| Fe(1)-C(7)      | 2.058(3)   |
| Fe(1)-C(1)      | 2.065(3)   |
| Fe(1)-C(3)      | 2.067(3)   |
| Fe(1)-C(2)      | 2.069(3)   |
| Fe(1)-P(2)      | 2.3255(8)  |
| Fe(1)-P(1)      | 2.3286(9)  |
| P(1)-C(3)       | 1.783(3)   |
| P(1)-P(2)       | 2.1297(11) |
| P(2)-C(1)       | 1.787(3)   |
|                 |            |
| C(6)-Fe(1)-C(5) | 40.24(12)  |
| C(6)-Fe(1)-C(8) | 67.47(13)  |
| C(5)-Fe(1)-C(8) | 67.45(13)  |
| C(6)-Fe(1)-C(4) | 67.47(12)  |
| C(5)-Fe(1)-C(4) | 40.05(13)  |
| C(8)-Fe(1)-C(4) | 40.17(12)  |
| C(6)-Fe(1)-C(7) | 40.21(12)  |
| C(5)-Fe(1)-C(7) | 67.63(12)  |
| C(8)-Fe(1)-C(7) | 40.20(12)  |
| C(4)-Fe(1)-C(7) | 67.59(12)  |
| C(6)-Fe(1)-C(1) | 157.68(12) |
| C(5)-Fe(1)-C(1) | 120.74(12) |
| C(8)-Fe(1)-C(1) | 121.49(12) |
| C(4)-Fe(1)-C(1) | 105.27(12) |
| C(7)-Fe(1)-C(1) | 158.61(12) |
| C(6)-Fe(1)-C(3) | 103.73(12) |
| C(5)-Fe(1)-C(3) | 114.97(13) |
| C(8)-Fe(1)-C(3) | 164.21(12) |
| C(4)-Fe(1)-C(3) | 150.37(12) |
| C(7)-Fe(1)-C(3) | 124.80(12) |
| C(1)-Fe(1)-C(3) | 71.72(11)  |
| C(6)-Fe(1)-C(2) | 122.69(12) |
| C(5)-Fe(1)-C(2) | 104.77(12) |
| C(8)-Fe(1)-C(2) | 155.25(12) |
| C(4)-Fe(1)-C(2) | 118.85(12) |
| C(7)-Fe(1)-C(2) | 160.64(11) |
| C(1)-Fe(1)-C(2) | 40.65(11)  |
| C(3)-Fe(1)-C(2) | 40.53(11)  |

|                 |            |
|-----------------|------------|
| C(6)-Fe(1)-P(2) | 154.69(9)  |
| C(5)-Fe(1)-P(2) | 157.54(9)  |
| C(8)-Fe(1)-P(2) | 100.98(10) |
| C(4)-Fe(1)-P(2) | 118.95(10) |
| C(7)-Fe(1)-P(2) | 116.67(9)  |
| C(1)-Fe(1)-P(2) | 47.57(8)   |
| C(3)-Fe(1)-P(2) | 81.59(9)   |
| C(2)-Fe(1)-P(2) | 77.45(8)   |
| C(6)-Fe(1)-P(1) | 111.13(9)  |
| C(5)-Fe(1)-P(1) | 147.97(10) |
| C(8)-Fe(1)-P(1) | 121.89(9)  |
| C(4)-Fe(1)-P(1) | 161.93(10) |
| C(7)-Fe(1)-P(1) | 99.31(9)   |
| C(1)-Fe(1)-P(1) | 82.36(8)   |
| C(3)-Fe(1)-P(1) | 47.40(9)   |
| C(2)-Fe(1)-P(1) | 77.70(8)   |
| P(2)-Fe(1)-P(1) | 54.46(3)   |
| C(3)-P(1)-P(2)  | 94.23(10)  |
| C(3)-P(1)-Fe(1) | 58.59(9)   |
| P(2)-P(1)-Fe(1) | 62.69(3)   |
| C(1)-P(2)-P(1)  | 95.13(10)  |
| C(1)-P(2)-Fe(1) | 58.55(9)   |
| P(1)-P(2)-Fe(1) | 62.84(3)   |
| C(2)-C(1)-P(2)  | 117.2(2)   |
| C(9)-C(1)-P(2)  | 116.6(2)   |
| C(2)-C(1)-Fe(1) | 69.83(16)  |
| C(9)-C(1)-Fe(1) | 129.17(18) |
| P(2)-C(1)-Fe(1) | 73.88(10)  |

---

**Table S3.** Torsion angles [°] for **2a**

---

|                       |           |
|-----------------------|-----------|
| P(2)-C(1)-C(9)-C(10)  | -131.8(3) |
| P(2)-C(1)-C(9)-C(14)  | 43.5(3)   |
| C(3)-C(2)-C(15)-C(20) | -124.1(3) |
| C(3)-C(2)-C(15)-C(16) | 56.5(4)   |
| P(1)-C(3)-C(21)-C(26) | -139.8(3) |
| P(1)-C(3)-C(21)-C(22) | 37.6(3)   |

---

**Table S4.** Bond lengths [Å] and angles [°] for **2c**

---

|                 |            |
|-----------------|------------|
| Fe(1)-C(5)      | 2.038(6)   |
| Fe(1)-C(4)      | 2.043(6)   |
| Fe(1)-C(7)      | 2.054(6)   |
| Fe(1)-C(6)      | 2.058(6)   |
| Fe(1)-C(8)      | 2.059(6)   |
| Fe(1)-C(3)      | 2.065(5)   |
| Fe(1)-C(2)      | 2.070(5)   |
| Fe(1)-C(1)      | 2.076(6)   |
| Fe(1)-P(1)      | 2.3238(18) |
| Fe(1)-P(2)      | 2.3287(15) |
| P(1)-C(3)       | 1.792(5)   |
| P(1)-P(2)       | 2.129(2)   |
| P(2)-C(1)       | 1.788(5)   |
|                 |            |
| C(5)-Fe(1)-C(4) | 40.5(3)    |
| C(5)-Fe(1)-C(7) | 67.4(3)    |
| C(4)-Fe(1)-C(7) | 67.7(3)    |
| C(5)-Fe(1)-C(6) | 40.0(3)    |
| C(4)-Fe(1)-C(6) | 67.6(3)    |
| C(7)-Fe(1)-C(6) | 40.0(2)    |
| C(5)-Fe(1)-C(8) | 67.5(2)    |
| C(4)-Fe(1)-C(8) | 40.3(3)    |
| C(7)-Fe(1)-C(8) | 40.0(3)    |
| C(6)-Fe(1)-C(8) | 67.2(2)    |
| C(5)-Fe(1)-C(3) | 122.7(2)   |
| C(4)-Fe(1)-C(3) | 159.2(2)   |
| C(7)-Fe(1)-C(3) | 122.2(2)   |
| C(6)-Fe(1)-C(3) | 107.2(2)   |
| C(8)-Fe(1)-C(3) | 158.3(2)   |
| C(5)-Fe(1)-C(2) | 106.4(2)   |
| C(4)-Fe(1)-C(2) | 123.8(2)   |
| C(7)-Fe(1)-C(2) | 155.7(2)   |
| C(6)-Fe(1)-C(2) | 120.2(2)   |
| C(8)-Fe(1)-C(2) | 161.5(2)   |
| C(3)-Fe(1)-C(2) | 39.8(2)    |
| C(5)-Fe(1)-C(1) | 115.0(2)   |
| C(4)-Fe(1)-C(1) | 102.9(2)   |
| C(3)-Fe(1)-C(1) | 71.3(2)    |
| C(2)-Fe(1)-C(1) | 40.7(2)    |
| C(5)-Fe(1)-P(1) | 158.5(2)   |
| C(4)-Fe(1)-P(1) | 152.86(18) |
| C(7)-Fe(1)-P(1) | 100.36(19) |
| C(8)-Fe(1)-P(1) | 115.16(19) |

|                 |            |
|-----------------|------------|
| C(3)-Fe(1)-P(1) | 47.74(14)  |
| C(2)-Fe(1)-P(1) | 77.27(16)  |
| C(1)-Fe(1)-P(1) | 81.96(17)  |
| C(5)-Fe(1)-P(2) | 146.9(2)   |
| C(4)-Fe(1)-P(2) | 109.47(18) |
| C(7)-Fe(1)-P(2) | 121.14(16) |
| C(6)-Fe(1)-P(2) | 161.10(18) |
| C(8)-Fe(1)-P(2) | 98.16(17)  |
| C(3)-Fe(1)-P(2) | 81.88(14)  |
| C(2)-Fe(1)-P(2) | 77.51(14)  |
| C(1)-Fe(1)-P(2) | 47.48(14)  |
| P(1)-Fe(1)-P(2) | 54.46(5)   |
| C(3)-P(1)-P(2)  | 94.40(19)  |
| C(3)-P(1)-Fe(1) | 58.54(18)  |
| P(2)-P(1)-Fe(1) | 62.89(6)   |
| C(1)-P(2)-P(1)  | 94.8(2)    |
| P(1)-P(2)-Fe(1) | 62.65(6)   |
| C(2)-C(1)-P(2)  | 117.0(4)   |
| C(2)-C(1)-Fe(1) | 69.4(3)    |
| P(2)-C(1)-Fe(1) | 73.7(2)    |

**Table S5.** Torsion angles [°] for **2c**

---

|                       |          |
|-----------------------|----------|
| P(2)-C(1)-C(9)-C(14)  | -39.6(7) |
| P(2)-C(1)-C(9)-C(10)  | 140.6(5) |
| C(3)-C(2)-C(15)-C(16) | -55.4(8) |
| C(3)-C(2)-C(15)-C(20) | 120.2(6) |
| P(1)-C(3)-C(21)-C(22) | -49.4(7) |
| P(1)-C(3)-C(21)-C(26) | 128.3(5) |

---

## References

- 1 M.J. Frisch, G.W. Trucks, H.B. Schlegel, G.E. Scuseria, M.A. Robb, J.R. Cheeseman, G. Scalmani, V. Barone, G.A. Petersson, H. Nakatsuji, et al., Gaussian 09 Revision A.02; Gaussian, Inc.: Wallingford, CT, USA, 2016.
- 2 C. Adamo and V. Barone, Toward reliable density functional methods without adjustable parameters: The PBE0 model, *J. Chem. Phys.*, 1999, **110**, 6158–6170.
- 3 F. Weigend and R. Ahlrichs, Balanced basis sets of split valence, triple zeta valence and quadruple zeta valence quality for H to Rn: Design and assessment of accuracy, *Phys. Chem. Chem. Phys.*, 2005, **7**, 3297–3305.
- 4 S. Grimme, J. Antony, S. Ehrlich and H.A. Krieg, A consistent and accurate ab initio parametrization of density functional dispersion correction (DFT-D) for the 94 elements H-Pu, *J. Chem. Phys.*, 2010, **132**, 154104–154119.
- 5 T. Yanai, D. Tew and N. Handy, A new hybrid exchange–correlation functional using the Coulomb-attenuating method (CAM-B3LYP), *Chem. Phys. Lett.*, 2004, **393**, 51–57.
- 6 V. Barone, M. Cossi, Quantum Calculation of Molecular Energies and Energy Gradients in Solution by a Conductor Solvent Model, *J. Phys. Chem. A*, 1998, **102**, 11, 1995–2001.
- 7 M. N. Khrizanforov, D. M. Arkhipova, R. P. Shekurov, T. P. Gerasimova, V. V. Ermolaev, D. R. Islamov, V. A. Miluykov, O. N. Kataeva, V. V. Khrizanforova, O. G. Sinyashin and Y. H. Budnikova, Novel paste electrodes based on phosphonium salt room temperature ionic liquids for studying the redox properties of insoluble compounds, *J. Solid State Electrochem.*, 2015, **19**, 2883–2890.
- 8 (a) Bruker. APEX3 Crystallography Software Suite, Bruker AXS, Inc., Madison, WI, USA. 2016; (b) Rigaku Oxford Diffraction, CrysAlisPro Software system Rigaku Corporation, Oxford, UK.
- 9 Bruker. SAINT. Crystallography Software Suite, Bruker AXS, Inc., Madison, WI, USA. 2016.
- 10 XPREP (Version 2014/2) and SADABS (Version 2014/4). Bruker AXS Inc., Madison, Wisconsin, USA.
- 11 G. M. Sheldrick, SHELXT - Integrated space-group and crystal-structure determination, *Acta Cryst.*, 2015, **A71**, 3–8
- 12 G. M. Sheldrick, Crystal structure refinement with SHELXL, *Acta Cryst.*, 2015, **C71**, 3–8.
- 13 E.W. Abel and G. Wilkinson, Carbonyl halides of manganese and some related compounds, *J. Chem. Soc.*, 1959, 1501–1505.
- 14 A.A Zagidullin, M.N. Khrizanforov, I.A. Bezkishko, P. Lönnecke, E. Hey-Hawkins and V.A. Miluykov, One-pot synthesis of sodium 3, 4, 5-triphenyl-1, 2-diphospholide through direct functionalization of white phosphorus, *J. Organomet. Chem.*, 2021, **956**, 122122.
- 15 I. Bezkishko, V. Miluykov, O. Sinyashin and E. Hey-Hawkins, The reaction of cyclopropenylphosphonium bromides with sodium polyphosphides as an advanced method of synthesis of sodium 1, 2-diphosphacyclopentadienides: Scope and limitations, *Phosphorus, Sulfur, Silicon and the Rel. El.*, 2011, **186**, 657–659.
